# Supplementary material for: Web-Based Training for Nurses on Using a Decision Aid to Support Shared Decision-making About Prenatal Screening: Parallel Controlled Trial
Source: PubMed Central journal article supplement (PMC8826152; doi:10.2196/31380), 2022-01-25
Supplement: nursing_v5i1e31380_app2.pdf [file nursing_v5i1e31380_app2.pdf]

**Supplementary file - Reporting of both programs according to the TIDieR items**

| <b>TIDieR item number</b> | <b>TIDieR item name</b>                 | <b>Intervention Group</b>                                                                                                                                                                                                                                                                                                                                                                                                                        | <b>Control Group</b>                                                                                                                                                                                                                                                                                                                                                                        |
|---------------------------|-----------------------------------------|--------------------------------------------------------------------------------------------------------------------------------------------------------------------------------------------------------------------------------------------------------------------------------------------------------------------------------------------------------------------------------------------------------------------------------------------------|---------------------------------------------------------------------------------------------------------------------------------------------------------------------------------------------------------------------------------------------------------------------------------------------------------------------------------------------------------------------------------------------|
| <b>1</b>                  | <b>Brief name</b>                       | Web-Based Training Program on SDM and Down Syndrome Prenatal Screening                                                                                                                                                                                                                                                                                                                                                                           | Web-Based Training Program and Down Syndrome Prenatal Screening                                                                                                                                                                                                                                                                                                                             |
| <b>2</b>                  | <b>Why</b>                              | This training on shared decision making aims to improve understanding of and knowledge about trisomy 21 screening. It primarily targets health professionals involved in prenatal follow-up of pregnant women and who support them in the decision about whether to take a prenatal screening test for trisomy 21. It is also relevant for anyone interested in shared decision-making, the use of decision support tools or prenatal screening. | This training aims to improve the understanding of issues surrounding the screening for trisomy 21. It is mainly aimed at health professionals who are involved in prenatal follow-up of pregnant women and who support them in the decision about whether to take a prenatal screening test for trisomy 21. It is also relevant for anyone interested in the ethics of prenatal screening. |
| <b>3</b>                  | <b>What (materials)</b>                 | Four modules containing videos, narrative capsules, additional resources (e.g. scientific articles and relevant links), audio of the videos, and a simulation module.<br>To access the training, the learner must have or be issued a Laval University ID.                                                                                                                                                                                       | Four modules containing videos, narrative capsules and additional resources (e.g. scientific articles and relevant links).<br>To access the training, the learner must have or be issued a Laval University ID.                                                                                                                                                                             |
| <b>4</b>                  | <b>What (procedures)</b>                | Once participants have access to the training, they complete the modules including the simulation module and fill out the questionnaires.                                                                                                                                                                                                                                                                                                        | Once participants have access to the training, they complete the modules and fill out the questionnaires.                                                                                                                                                                                                                                                                                   |
| <b>5</b>                  | <b>Who provided</b>                     | Self-training                                                                                                                                                                                                                                                                                                                                                                                                                                    | Self-training                                                                                                                                                                                                                                                                                                                                                                               |
| <b>6</b>                  | <b>How</b>                              | Online                                                                                                                                                                                                                                                                                                                                                                                                                                           | Online                                                                                                                                                                                                                                                                                                                                                                                      |
| <b>7</b>                  | <b>Where</b>                            | The training can be done anywhere - At the participant's preferred location.                                                                                                                                                                                                                                                                                                                                                                     | The training can be done anywhere - At the participant's preferred location.                                                                                                                                                                                                                                                                                                                |
| <b>8</b>                  | <b>When and how much</b>                | Once, at any time according to the availability of the participant.                                                                                                                                                                                                                                                                                                                                                                              | Once, at any time according to the availability of the participant.                                                                                                                                                                                                                                                                                                                         |
| <b>9</b>                  | <b>Tailoring</b>                        | Not applicable                                                                                                                                                                                                                                                                                                                                                                                                                                   | Not applicable                                                                                                                                                                                                                                                                                                                                                                              |
| <b>10</b>                 | <b>Modifications</b>                    | No changes were made to the training during the intervention.                                                                                                                                                                                                                                                                                                                                                                                    | No changes were made to the training during the intervention.                                                                                                                                                                                                                                                                                                                               |
| <b>11</b>                 | <b>Fidelity (Planned) – If assessed</b> | Not assessed                                                                                                                                                                                                                                                                                                                                                                                                                                     | Not assessed                                                                                                                                                                                                                                                                                                                                                                                |
| <b>12</b>                 | <b>Fidelity (Actual) – If assessed</b>  | Not assessed                                                                                                                                                                                                                                                                                                                                                                                                                                     | Not assessed                                                                                                                                                                                                                                                                                                                                                                                |
